# Supplementary material for: Drug-resistant Enterobacteriaceae colonization is associated with healthcare utilization and antimicrobial use among inpatients in Pune, India
Source: PubMed Central journal article supplement (PMC6172743; doi:10.1186/s12879-018-3390-4), 2018-10-04
Supplement: 12879_2018_3390_MOESM1_ESM.pdf [file 12879_2018_3390_MOESM1_ESM.pdf]

| <b>Supplementary table: Demographics and clinical characteristics of patients with and without carbapenem-resistant Enterobacteriaceae colonization at enrollment</b>                                                                                                                                       |                                                |                                           |         |
|-------------------------------------------------------------------------------------------------------------------------------------------------------------------------------------------------------------------------------------------------------------------------------------------------------------|------------------------------------------------|-------------------------------------------|---------|
| Patient characteristic                                                                                                                                                                                                                                                                                      | Not colonized, N=883,<br>n (%) or median (IQR) | Colonized, N=14,<br>n (%) or median (IQR) | p-value |
| Age                                                                                                                                                                                                                                                                                                         | 20 (4-35)                                      | 30 (8-39.5)                               | 0.36    |
| Male                                                                                                                                                                                                                                                                                                        | 487 (55)                                       | 7 (50)                                    | 0.58    |
| Diabetes                                                                                                                                                                                                                                                                                                    | 34 (4)                                         | 1 (7)                                     | 0.47    |
| HIV*                                                                                                                                                                                                                                                                                                        | 85 (17)                                        | 4 (40)                                    | 0.1     |
| Vegetarian                                                                                                                                                                                                                                                                                                  | 89 (10)                                        | 4 (29)                                    | 0.06    |
| Alcoholism                                                                                                                                                                                                                                                                                                  | 57 (6)                                         | 0 (0)                                     | -       |
| Smoking                                                                                                                                                                                                                                                                                                     | 67 (8)                                         | 1 (7)                                     | 1       |
| Income < 5,000 INR per month                                                                                                                                                                                                                                                                                | 281 (32)                                       | 2 (14)                                    | 0.16    |
| Works with animals                                                                                                                                                                                                                                                                                          | 150 (17)                                       | 3 (21)                                    | 0.74    |
| Farmer or laborer                                                                                                                                                                                                                                                                                           | 317 (36)                                       | 5 (36)                                    | 1       |
| General practitioner visit prior to hospitalization                                                                                                                                                                                                                                                         | 273 (33)                                       | 4 (31)                                    | 0.78    |
| Ayurvedic provider visit prior to hospitalization                                                                                                                                                                                                                                                           | 36 (4)                                         | 1 (8)                                     | 0.51    |
| Hospitalized within the past 3 months                                                                                                                                                                                                                                                                       | 113 (13)                                       | 6 (43)                                    | <0.01   |
| Surgery within the past 3 months                                                                                                                                                                                                                                                                            | 9 (1)                                          | 0 (0)                                     | -       |
| Self-report of antibiotic use in the last month                                                                                                                                                                                                                                                             | 188 (21)                                       | 5 (36)                                    | 0.34    |
| Admission to ICU                                                                                                                                                                                                                                                                                            | 153 (17)                                       | 3 (21)                                    | 0.73    |
| Cough                                                                                                                                                                                                                                                                                                       | 370 (42)                                       | 6 (43)                                    | 1       |
| Diarrhea                                                                                                                                                                                                                                                                                                    | 154 (17)                                       | 5 (36)                                    | 0.16    |
| <p>IQR: interquartile range; INR: Indian Rupees; ICU: intensive care unit<br/>           *HIV test results were available for 497 patients without enrollment carbapenem-resistant Enterobacteriaceae colonization and 10 patients with enrollment carbapenem-resistant Enterobacteriaceae colonization</p> |                                                |                                           |         |
